# Supplementary material for: Lithium–Sodium Fly Ash-Derived Catalyst for the In Situ Partial Deoxygenation of Isochrysis sp. Microalgae Bio-Oil
Source: MDPI journal article supplement (doi:10.3390/catal13071122), 2023-07-19
Supplement: s1 [file s1]

## Supplementary Information

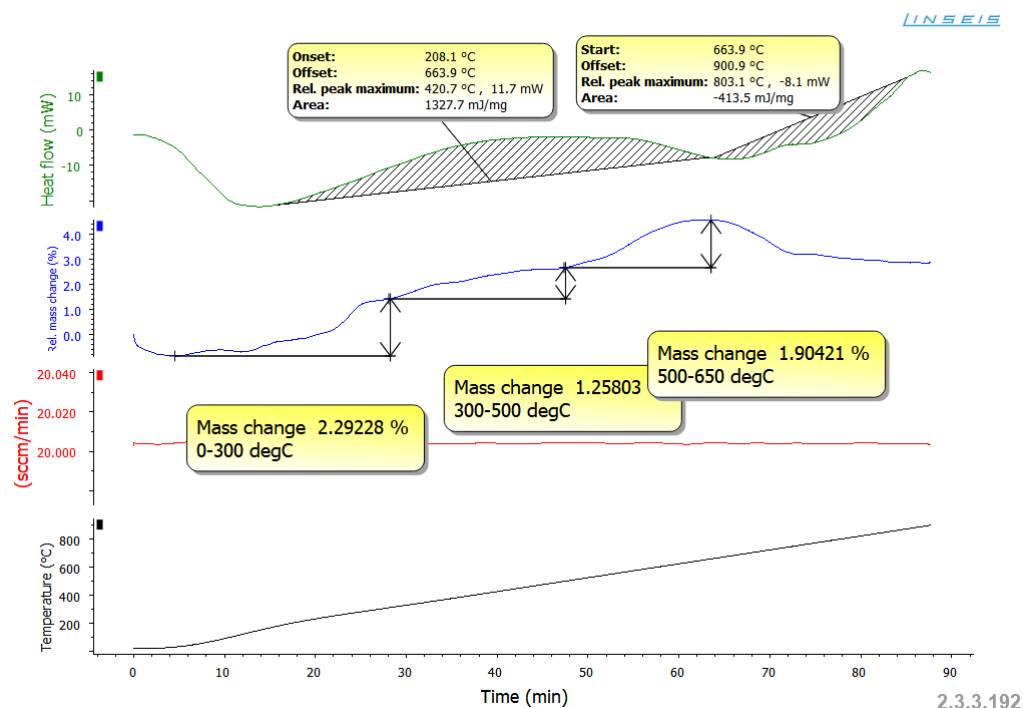

Figure S1. LiNa-FA base sites assessment with quantification using TGA.

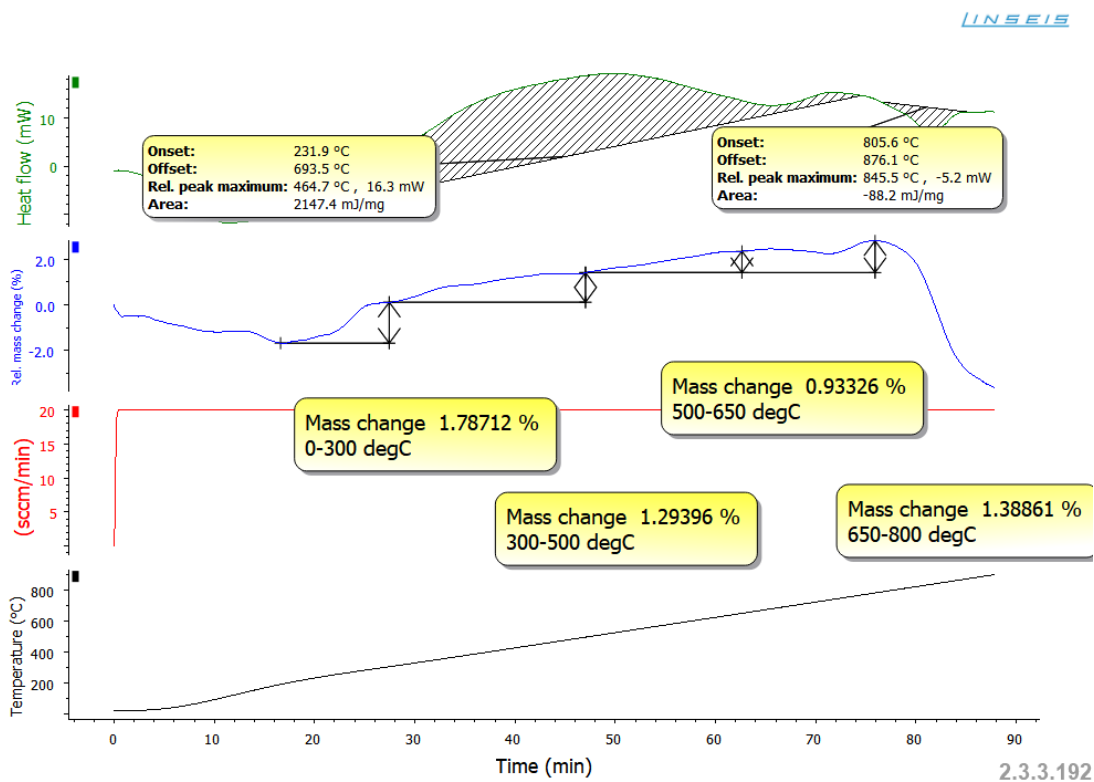

Figure S2. Na-FA base sites assessment with quantification using TGA.

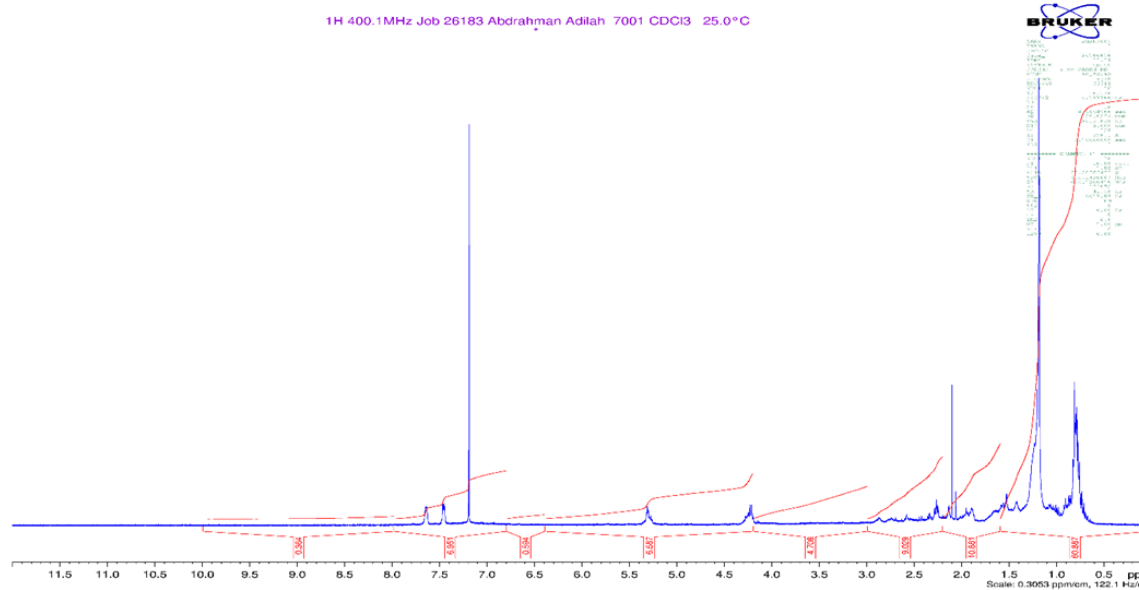

**Figure S3.** Proton NMR integration done based on the chemical shift region (ppm) which represents different group attached to the H bonding; 0.0 to 1.6, 1.6 to 2.2, 2.2 to 3.0, 3.0 to 4.2, 4.2 to 6.4, 6.4 to 6.8, 6.8 to 8.0, and 8.0 to 10.0.

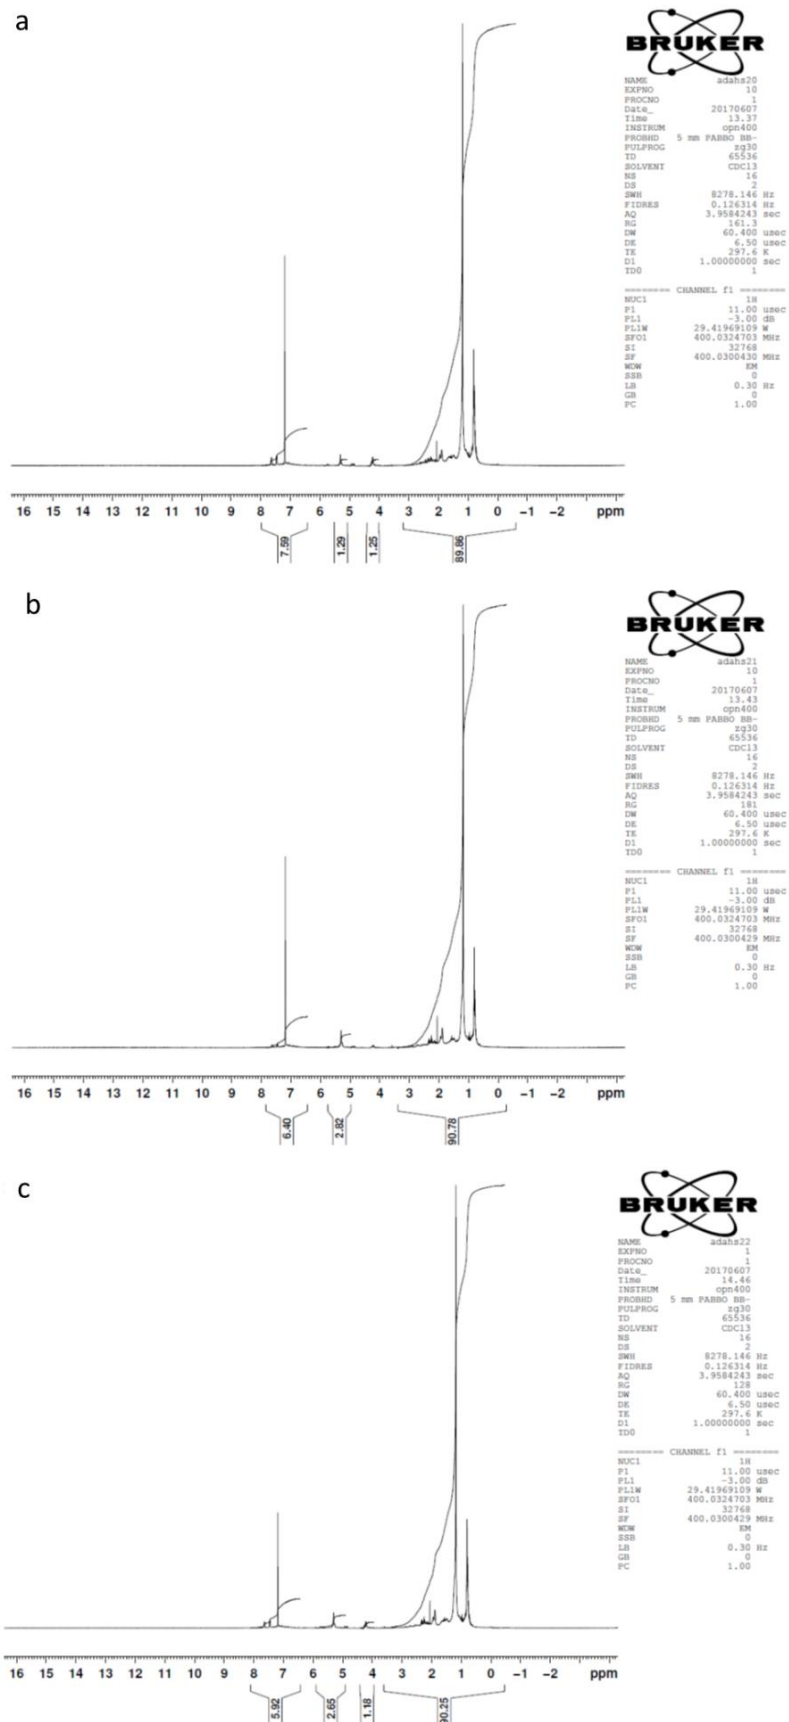

**Figure S4.** Proton NMR as received. a) without catalyst; b) with LiNa-FA; c) with Na-FA.
