# Supplementary material for: Lithium–Sodium Fly Ash-Derived Catalyst for the In Situ Partial Deoxygenation of Isochrysis sp. Microalgae Bio-Oil
Source: MDPI journal article supplement (doi:10.3390/catal13071122), 2023-07-19
Supplement: s1 [file s1]

Archive with 1 entries (1 files):
- catalysts-2426461-supplementary.pdf
